# Supplementary material for: Facile synthesis of histidine functional poly(N-isopropylacrylamide): zwitterionic and temperature responsive materials
Source: Royal Society of Chemistry journal article supplement (doi:10.1039/c5py01915j), 2016-01-01
Supplement: c5py01915j1.pdf [file c5py01915j1.pdf]

Supporting Information for

## Facile synthesis of histidine functional Poly(N-isopropylacrylamide): Zwitterionic and temperature responsive materials

*Emma R. L. Brisson, Zeyun Xiao, Lucas Levin, George V. Franks, Luke A. Connal\**

Department of Chemical and Biomolecular Engineering, The University of Melbourne, Victoria 3010,  
Australia. E-mail: [luke.connal@unimelb.edu.au](mailto:luke.connal@unimelb.edu.au)

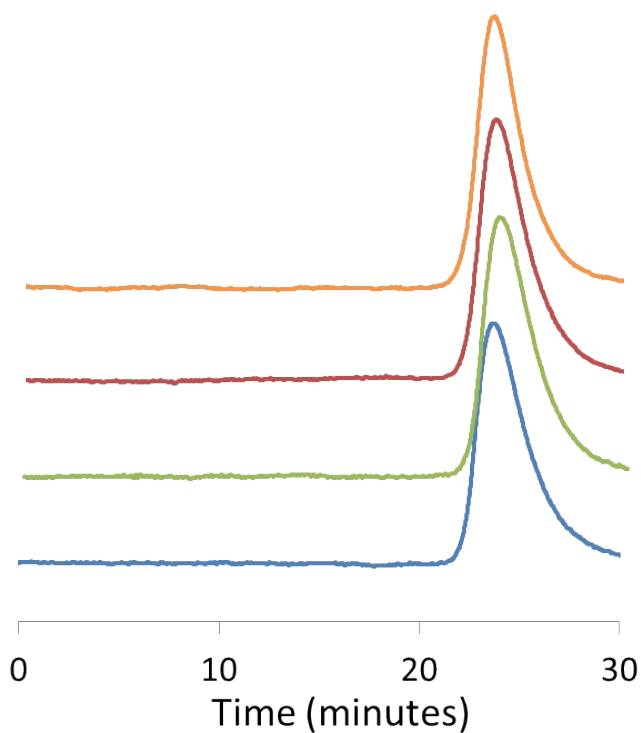

**Fig. S1** The GPC traces in DMF of the aldehyde functional PNIPAm copolymers with MWs  $\approx$  50000 and  $\delta$  1.5-1.6.

### Synthesis of poly(*N*-isopropylacrylamide)

Into a schlenk tube, NiPAm (1.0 g, 8.84 mmol), CDP (0.024 g, 0.059 mmol), and AIBN (0.0029 g, 0.018 mmol) were dissolved in THF ca. 40% wt/wt. After three freeze pump thaw iterations, the polymerization was heated to 65°C and proceeded for 16 hours. The polymer was precipitated twice into diethyl ether and dried in a vacuum desiccator overnight, yielding a white powder (0.6903 g, 69%).  $^1\text{H NMR}$  (400 MHz,  $\text{CDCl}_3$ ):  $\delta$  = 8.10-7.40 (broad, 0.96 H), 4.05-3.84 (broad, 1 H), 2.29-0.89 (broad, 9.34 H).

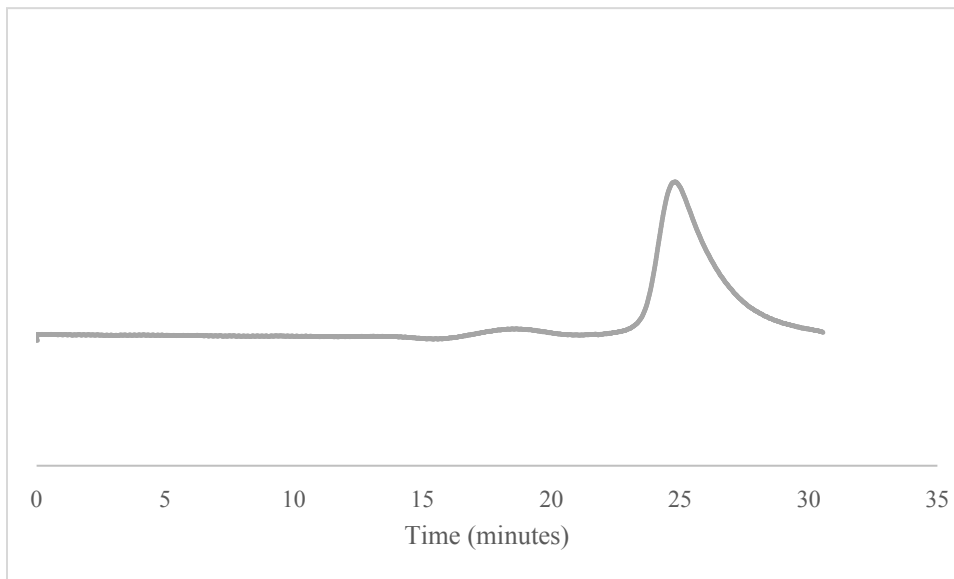

**Fig. S2** The GPC (in DMF) trace of PNiPAm homopolymer synthesized by RAFT polymerization using CDP as the RAFT agent. The polydispersity is 1.43.

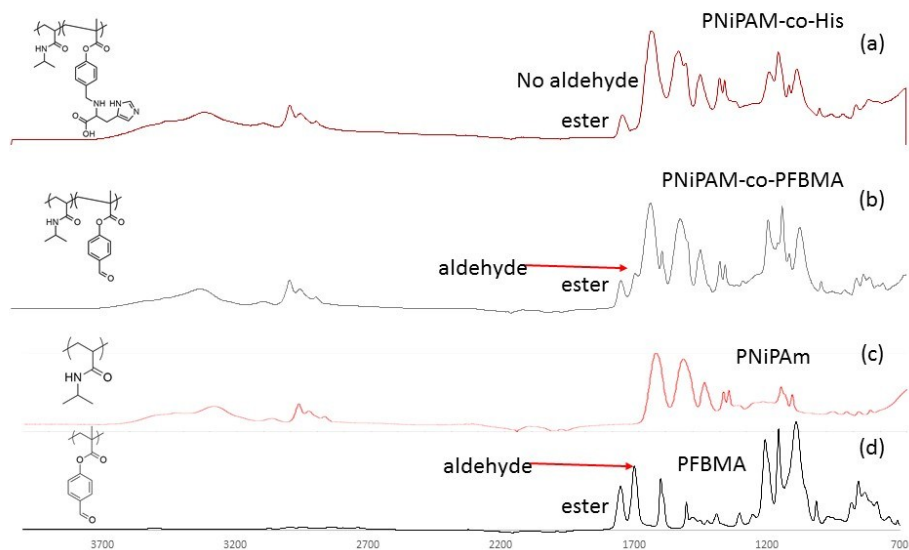

**Fig. S3** The full FTIR spectra of PNiPAm<sub>73</sub>-co-His<sub>23</sub> (a), PNiPAm<sub>73</sub>-co-PFBMA<sub>26</sub> (b), PNiPAm (c) and PFBMA. In spectra (b) and (d) the aldehyde peak is clearly visible at 1700cm<sup>-1</sup>. After reductive amination, this peak disappears as can be seen in the FTIR spectra of PNiPAm<sub>73</sub>-co-His<sub>23</sub> (a).
